# Supplementary material
Source: HighWire-hosted journal article supplement (doi:10.1101/rna.079971.124)
Supplement: Supplemental_Table.pdf [file Supplemental_Table.pdf]

# SUPPLEMENTAL TABLE 1

pairSum=9 for  $\Delta\text{PSI} \geq 0.15$  Average  $\Delta\text{PSI} > 0.20$

## Alternative 5'ss Events - A5

Negative value in "Distance Between 5'ss" indicates that mutant promotes upstream 5'ss usage

Positive value in "Distance Between 5'ss" indicates that mutant promotes downstream 5'ss usage

### A5 SZ211 snrp-27(M141T) vs. N2

| event_name | Gene       | Upstream 5'ss | Downstream 5'ss | Distance Between 5'ss | Avg $\Delta\text{PSI}$ | Genome Position                |
|------------|------------|---------------|-----------------|-----------------------|------------------------|--------------------------------|
| A5.00377   | rskn-2     | GTAATGT       | GTGAGAA         | -5                    | 70.53%                 | ce10::chrI:8019510-8019846     |
| A5.02960   | gon-14     | GTCAAGT       | GTGAGCT         | -34                   | 70.20%                 | ce10::chrV:6606743-6607634     |
| A5.00077   | W03F11.5   | GCAGTGA       | GTGAGAT         | -3                    | 60.92%                 | ce10::chrI:2217078-2217391     |
| A5.02596   | ltah-1.1   | GTTGTGA       | GTGATTT         | -3                    | 59.37%                 | ce10::chrIV:12279926-12280270  |
| A5.01208   | Y17G7B.8   | GGATGGG       | GTTATTT         | -7                    | 55.96%                 | ce10::chrIII:12025816-12026217 |
| A5.02595   | C42C1.13   | GCAAGAA       | GTGAATT         | -8                    | 55.91%                 | ce10::chrIV:12278835-12279171  |
| A5.00248   | gpa-14     | GTGAGTT       | GTTGTAA         | 11                    | -54.08%                | ce10::chrI:5942827-5943857     |
| A5.00387   | kcnl-2     | GTAGCGT       | GTTTCGTT        | -20                   | 50.82%                 | ce10::chrI:8207887-8208594     |
| A5.01451   | Y71H2AM.2  | GTAAGGA       | GTTGAGT         | -7                    | 48.24%                 | ce10::chrIII:2824523-2825830   |
| A5.01029   | pch-2      | GTTGTGA       | GTGAGCG         | -3                    | 45.12%                 | ce10::chrIII:8158285-8158545   |
| A5.02919   | ncx-2      | GTAACGG       | GTTTGTG         | -6                    | 42.47%                 | ce10::chrV:5308471-5308917     |
| A5.00046   | Y34D9A.8   | GTTTGTG       | GTAGAGT         | 18                    | -41.57%                | ce10::chrI:1051917-1052238     |
| A5.01447   | Y71H2AM.20 | GTTAATT       | GTAAAAA         | 21                    | -40.89%                | ce10::chrIII:2782797-2784072   |
| A5.03493   | T01D3.6    | GTCAGTA       | GTACCGC         | 36                    | -40.61%                | ce10::chrV:13718434-13718767   |
| A5.03669   | nhr-65     | GTGAGTT       | GTAAAAA         | 12                    | -40.24%                | ce10::chrV:18841168-18841720   |
| A5.01963   | ssl-1      | GTAAAAA       | GTATGGA         | 9                     | -38.54%                | ce10::chrIII:12738149-12740028 |
| A5.03422   | F45D3.2    | GTACACA       | GTTAGTA         | -8                    | 37.97%                 | ce10::chrV:12541820-12542403   |
| A5.04294   | K04C1.2    | GTACAGG       | GTCAGTT         | -27                   | 37.63%                 | ce10::chrX:14238681-14239042   |
| A5.02362   | T14A8.2    | GTGAGTT       | GTAATGT         | 15                    | -37.39%                | ce10::chrIV:7822017-7822620    |
| A5.00193   | M04F3.4    | GTCCTTT       | GTGATTT         | -17                   | 36.99%                 | ce10::chrI:4771344-4771687     |
| A5.01464   | Y53G8AR.8  | GTTTCAG       | GCGATTT         | -27                   | 36.72%                 | ce10::chrIII:3293673-3294054   |
| A5.04108   | ubc-22     | GTCATGT       | GTTAGTT         | -12                   | 35.94%                 | ce10::chrX:8867948-8868632     |
| A5.00968   | nhr-21     | GTCCGAG       | GTACCTA         | -6                    | 35.63%                 | ce10::chrIII:7347333-7347680   |
| A5.02177   | Y67D8C.25  | GCAAGTT       | GTTTTCA         | 25                    | -35.25%                | ce10::chrIV:3137034-3137773    |
| A5.00102   | itx-1      | GTATGGT       | GTGAGTT         | -13                   | 34.85%                 | ce10::chrI:2814210-2815614     |
| A5.02245   | Y4C6B.7    | GTAAGAA       | GTTTCGTG        | -8                    | 34.78%                 | ce10::chrIV:5351431-5351901    |
| A5.02223   | hoe-1      | GTAAGGG       | GTTTGTG         | -6                    | 34.38%                 | ce10::chrIV:4743295-4744271    |
| A5.02850   | T20D4.3    | GTTAGTA       | GTATGAA         | 21                    | -33.21%                | ce10::chrV:3419174-3419444     |
| A5.04159   | mig-15     | GTGAGTC       | GTTTTGT         | 15                    | -32.99%                | ce10::chrX:10425190-10425705   |
| A5.03532   | F14D7.6    | GTTTCGTT      | GTAATTT         | 37                    | -32.76%                | ce10::chrV:14302154-14305416   |
| A5.03883   | lst-2      | GTGGTGA       | GTGAGAA         | -3                    | 32.38%                 | ce10::chrX:4379331-4379658     |
| A5.03784   | dgk-1      | GTAAGGG       | GTCAGAT         | -6                    | 32.12%                 | ce10::chrX:988928-9889630      |
| A5.03318   | K10D6.2    | GTTGGTA       | GTAGTTT         | 4                     | -31.93%                | ce10::chrV:11193895-11194330   |
| A5.00154   | unc-73     | GTGAGTG       | GTAGGAA         | 45                    | -31.38%                | ce10::chrI:4002365-4002746     |
| A5.04365   | ZK54.3     | GTGAATC       | GTAAGGC         | 12                    | -31.38%                | ce10::chrX:17465584-17466072   |
| A5.02793   | nhr-56     | GTAATGT       | GTGAGTT         | -5                    | 30.11%                 | ce10::chrV:2220142-2220479     |
| A5.01378   | Y82E9BR.5  | GTAAGTG       | GTGAGTA         | -4                    | 29.28%                 | ce10::chrIII:1385081-1387559   |
| A5.03552   | hil-1      | GTTAGTG       | GTACTGT         | 12                    | -29.07%                | ce10::chrV:14951846-14952475   |

|          |          |         |          |     |         |                                |
|----------|----------|---------|----------|-----|---------|--------------------------------|
| A5.03311 | math-33  | GTGAGTT | GTAAGTT  | 9   | -29.04% | ce10::chrV:11117403-11117727   |
| A5.00985 | npp-21   | GTCAGTG | GTTAGTA  | -6  | 29.02%  | ce10::chrII:7606342-7606684    |
| A5.01360 | fbxa-11  | GTGAATT | GTGGGTT  | 13  | -28.20% | ce10::chrIII:950846-951330     |
| A5.03854 | sax-3    | GTGAGCT | GTATTTT  | 15  | -26.57% | ce10::chrX:3452959-3453373     |
| A5.01859 | rnf-113  | GTGAGAT | GTACTTT  | 11  | -26.53% | ce10::chrIII:10757191-10757547 |
| A5.01139 | stip-1   | GTGGGGT | GTGAGAT  | -5  | 25.97%  | ce10::chrII:10349659-10349972  |
| A5.00049 | grh-1    | GTAAGGG | GTTAGTC  | -6  | 25.24%  | ce10::chrI:1264768-1265570     |
| A5.03734 | B0250.12 | GTTTGTA | GTAATTT  | 4   | -25.08% | ce10::chrV:20466725-20467638   |
| A5.00978 | F35D2.3  | GTCAGTC | GTGGTGT  | 12  | -24.98% | ce10::chrII:7571591-7571933    |
| A5.04332 | nhr-48   | GTATTCT | GTCAGTA  | -18 | 24.69%  | ce10::chrX:15711273-15711635   |
| A5.00528 | cdc-26   | GTGGTCA | GTCAATG  | -3  | 24.55%  | ce10::chrI:10639298-10639636   |
| A5.00899 | C30B5.2  | GTACGGG | GTTAGTT  | -6  | 24.39%  | ce10::chrII:6197332-6197654    |
| A5.01501 | hse-5    | GTTAGTA | GTAAGAA  | 4   | -23.70% | ce10::chrIII:4348821-4349854   |
| A5.01417 | W04B5.3  | GTGATTC | GTAAAAT  | 30  | -23.27% | ce10::chrIII:2419147-2419738   |
| A5.02643 | pik-1    | GTAGAGT | GTTTCGTT | -5  | 23.22%  | ce10::chrIV:13419370-13421032  |
| A5.03472 | Y2H9A.4  | GTATATA | GTGAGAT  | -9  | 23.02%  | ce10::chrV:13446560-13447229   |
| A5.00740 | btb-9    | GTGAGTT | GTTAGGC  | 15  | -22.63% | ce10::chrII:1728528-1728893    |
| A5.03959 | acs-17   | GTGAGTA | GTATGTT  | 9   | -21.98% | ce10::chrX:5939673-5940216     |
| A5.03202 | swt-5    | GTATTGA | GTTTGTT  | -23 | 21.75%  | ce10::chrV:9503623-9504446     |

### A5 SZ370 snu-66(H765G) vs. N2

| event_name | Gene      | Upstream<br>5'ss | Downstream<br>5'ss | Distance<br>Between<br>5'ss | AvgΔPSI | Genome<br>Position             |
|------------|-----------|------------------|--------------------|-----------------------------|---------|--------------------------------|
| A5.02960   | gon-14    | GTCAAGT          | GTGAGCT            | -34                         | 82.10%  | ce10::chrV:6606743-6607634     |
| A5.03011   | ddo-2     | GTGAGGT          | GTTCTTT            | 5                           | -76.38% | ce10::chrV:7434437-7434972     |
| A5.01914   | Y41C4A.12 | GCAAGTC          | GTCGAAT            | 4                           | -75.55% | ce10::chrIII:11723948-11724259 |
| A5.00652   | Y105E8B.7 | GTGAGGT          | GTTACAC            | 5                           | -70.88% | ce10::chrI:14645995-14646546   |
| A5.04108   | ubc-22    | GTCATGT          | GTTAGTT            | -12                         | 63.39%  | ce10::chrX:8867948-8868632     |
| A5.01647   | C09E7.7   | GTGTTCA          | GTGAGAA            | -9                          | 59.72%  | ce10::chrIII:6550487-6550821   |
| A5.00118   | zip-4     | GTGAGGT          | GTGCCAG            | 5                           | -58.63% | ce10::chrI:3264333-3264677     |
| A5.03552   | hil-1     | GTTAGTG          | GTTACTGT           | 12                          | -57.75% | ce10::chrV:14951846-14952475   |
| A5.00827   | hlh-1     | GTGAGCT          | GTTAGTA            | 22                          | -56.41% | ce10::chrII:4521586-4522110    |
| A5.00377   | rskn-2    | GTAATGT          | GTGAGAA            | -5                          | 54.98%  | ce10::chrI:8019510-8019846     |
| A5.02115   | Y41D4A.6  | GTGGGGG          | GTTCTTC            | 6                           | -54.55% | ce10::chrIV:1741285-1741629    |
| A5.00046   | Y34D9A.8  | GTTTGTTG         | GTAGAGT            | 18                          | -54.29% | ce10::chrI:1051917-1052238     |
| A5.00248   | gpa-14    | GTGAGTT          | GTTGTAA            | 11                          | -53.68% | ce10::chrI:5942827-5943857     |
| A5.02366   | ntl-4     | GTCGGTG          | GTTTCGTA           | -6                          | 52.43%  | ce10::chrIV:7911487-7911824    |
| A5.00193   | M04F3.4   | GTCTTTT          | GTGATTT            | -17                         | 50.16%  | ce10::chrI:4771344-4771687     |
| A5.03883   | lst-2     | GTGGTGA          | GTGAGAA            | -3                          | 47.61%  | ce10::chrX:4379331-4379658     |
| A5.00077   | W03F11.5  | GCAGTGA          | GTGAGAT            | -3                          | 47.41%  | ce10::chrI:2217078-2217391     |
| A5.02596   | ltah-1.1  | GTTGTGA          | GTGATTT            | -3                          | 47.06%  | ce10::chrIV:12279926-12280270  |
| A5.00899   | C30B5.2   | GTACGGG          | GTTAGTT            | -6                          | 47.05%  | ce10::chrII:6197332-6197654    |
| A5.01701   | cup-5     | GTCGGTG          | GTGCGTG            | -4                          | 46.00%  | ce10::chrIII:7590471-7591017   |
| A5.01339   | cox-17    | GTGAGGT          | GTTTTGA            | 5                           | -44.96% | ce10::chrIII:190973-191910     |
| A5.01663   | T07E3.4   | GTAGGTT          | GTTAAGC            | 4                           | -44.53% | ce10::chrIII:6897950-6898258   |
| A5.00387   | kcnl-2    | GTAGCGT          | GTTTCGTT           | -20                         | 44.49%  | ce10::chrI:8207887-8208594     |
| A5.00595   | W05B5.1   | GTGAGGA          | GTTTATG            | 13                          | -43.34% | ce10::chrI:13035248-13035646   |
| A5.01996   | pdr-1     | GTAGGTC          | GTCAAGT            | 4                           | -41.58% | ce10::chrIII:13771543-13771926 |

|          |           |          |          |     |         |                                |
|----------|-----------|----------|----------|-----|---------|--------------------------------|
| A5.01151 | mpz-1     | GTTGGTA  | GTAAGCA  | 12  | -41.38% | ce10::chrII:10740233-10741190  |
| A5.01029 | pch-2     | GTTGTGA  | GTGAGCG  | -3  | 41.33%  | ce10::chrII:8158285-8158545    |
| A5.02948 | cest-33   | GCAAGTT  | GTTCCACC | 4   | -40.85% | ce10::chrV:6364973-6365289     |
| A5.00469 | irx-1     | GTGAGGT  | GTGAATA  | 13  | -39.82% | ce10::chrI:9537044-9538343     |
| A5.01576 | molo-1    | GTCAGTT  | GTTTGAT  | 13  | -38.09% | ce10::chrIII:5576459-5577124   |
| A5.00897 | exp-1     | GTTAGAT  | GTTATCT  | 45  | -37.77% | ce10::chrII:6159885-6160183    |
| A5.03834 | tra-4     | GTAGGTT  | GTTCCAGC | 4   | -37.58% | ce10::chrX:2855268-2855613     |
| A5.00174 | eri-7     | GTTAGTT  | GTGCAGC  | 30  | -37.05% | ce10::chrI:4454892-4455451     |
| A5.00985 | npp-21    | GTCAGTG  | GTTAGTA  | -6  | 36.90%  | ce10::chrII:7606342-7606684    |
| A5.02362 | T14A8.2   | GTGAGTT  | GTAATGT  | 15  | -36.31% | ce10::chrIV:7822017-7822620    |
| A5.03318 | K10D6.2   | GTTGGTA  | GTAGTTT  | 4   | -36.16% | ce10::chrV:11193895-11194330   |
| A5.01689 | kap-1     | GCATGCA  | GTTTCTA  | 9   | -36.14% | ce10::chrIII:7340385-7340724   |
| A5.01378 | Y82E9BR.5 | GTAAGTG  | GTGAGTA  | -4  | 36.13%  | ce10::chrIII:1385081-1387559   |
| A5.01644 | acr-5     | GTATGGG  | GTAAGCA  | -18 | 36.06%  | ce10::chrIII:6514429-6514756   |
| A5.01809 | ZK632.5   | GTAGGTT  | GTTTGAC  | 4   | -35.90% | ce10::chrIII:9808446-9808735   |
| A5.03902 | dnj-14    | GTATGGG  | GTCTGTT  | -6  | 35.63%  | ce10::chrX:4710087-4710434     |
| A5.04156 | pkn-1     | GTCAGTA  | GTGAGTA  | -18 | 35.31%  | ce10::chrX:10400056-10400563   |
| A5.00760 | math-41   | GCAAGTA  | GTACAGT  | 4   | -34.44% | ce10::chrII:1827136-1829057    |
| A5.03311 | math-33   | GTGAGTT  | GTAAGTT  | 9   | -34.44% | ce10::chrV:11117403-11117727   |
| A5.00154 | unc-73    | GTGAGTG  | GTAGGAA  | 45  | -34.02% | ce10::chrI:4002365-4002746     |
| A5.03578 | C06B8.12  | GTTGGTC  | GTCAAAT  | 4   | -33.75% | ce10::chrV:15482232-15482542   |
| A5.02919 | ncx-2     | GTAACGG  | GTTTGTG  | -6  | 33.38%  | ce10::chrV:5308471-5308917     |
| A5.03196 | K07B1.7   | GTGTTAG  | GTTAGTT  | -2  | 33.17%  | ce10::chrV:9346621-9346958     |
| A5.04134 | nra-3     | GTAGGTT  | GTTAAAA  | 4   | -32.66% | ce10::chrX:9931081-9931413     |
| A5.03784 | dgk-1     | GTAAGGG  | GTCAGAT  | 6   | -32.46% | ce10::chrX:988928-989630       |
| A5.03475 | T10G3.1   | GTTCCGAG | GTCCATA  | 15  | -32.21% | ce10::chrV:13470645-13473513   |
| A5.01464 | Y53GAR.8  | GTTTCAG  | GCGATTT  | -27 | 32.13%  | ce10::chrIII:3293673-3294054   |
| A5.01411 | polh-1    | GTGGGTA  | GTAAGCT  | -4  | 32.02%  | ce10::chrIII:1949924-1950266   |
| A5.01859 | rnf-113   | GTGAGAT  | GTACTTT  | 11  | -31.83% | ce10::chrIII:10757191-10757547 |
| A5.00009 | Y48G1C.8  | GTGAGCA  | GTTTTGA  | 10  | -31.63% | ce10::chrI:97815-98441         |
| A5.03442 | F15B9.10  | GTGGTGG  | GTGAGAT  | -6  | 31.55%  | ce10::chrV:13007126-13007463   |
| A5.00287 | T10E9.3   | GCAAGTT  | GTTGATT  | 4   | -31.33% | ce10::chrI:6536502-6536804     |
| A5.03893 | lnp-1     | GCAAGTT  | GTTTTTG  | 4   | -30.73% | ce10::chrX:4588730-4589036     |
| A5.03669 | nhr-65    | GTGAGTT  | GTAAAAA  | 12  | -30.64% | ce10::chrV:18841168-18841720   |
| A5.01963 | ssl-1     | GTAAAAA  | GTATGGA  | 9   | -30.31% | ce10::chrIII:12738149-12740028 |
| A5.04159 | mig-15    | GTGAGTC  | GTTTTGT  | 15  | -30.20% | ce10::chrX:10425190-10425705   |
| A5.01041 | skpo-1    | GTAGAAG  | GTAAGTT  | -6  | 29.59%  | ce10::chrII:8425418-8426118    |
| A5.01616 | C23G10.7  | GTGAGCA  | ATTAGTC  | 27  | -29.50% | ce10::chrIII:6196154-6196545   |
| A5.03532 | F14D7.6   | GTTTCGTT | GTAATTT  | 37  | -29.15% | ce10::chrV:14302154-14305416   |
| A5.00210 | apm-1     | GTTAAAG  | GTGATTA  | -6  | 28.76%  | ce10::chrI:5342994-5343337     |
| A5.01646 | C09E7.7   | GTGTTCA  | GTGAGAA  | -9  | 28.53%  | ce10::chrIII:6550487-6550824   |
| A5.00716 | ptr-3     | GTCAGAA  | GCAAGAA  | -9  | 27.85%  | ce10::chrII:367320-367564      |
| A5.01451 | Y71H2AM.2 | GTAAGGA  | GTTGAGT  | -7  | 27.75%  | ce10::chrIII:2824523-2825830   |
| A5.00721 | T07D3.4   | GTTTTAA  | GTTTGAA  | -9  | 27.72%  | ce10::chrII:888718-889043      |
| A5.03242 | C51E3.10  | GTGAGGT  | GTGAATA  | 5   | -27.14% | ce10::chrV:10160479-10161003   |
| A5.02718 | T02D1.8   | GTAGGTC  | GTCTACA  | 4   | -27.03% | ce10::chrIV:17387198-17387529  |
| A5.00819 | H20J04.9  | GTTAAAG  | GTGCTTA  | -6  | 26.29%  | ce10::chrII:4352129-4353042    |
| A5.01591 | mdt-15    | GTAAGTT  | GTAGAGT  | 9   | -26.06% | ce10::chrIII:5829544-5830287   |
| A5.02476 | Y11D7A.10 | GTAAGCG  | GTTGTTT  | 10  | -25.92% | ce10::chrIV:9259533-9259765    |

|          |           |         |         |     |         |                               |
|----------|-----------|---------|---------|-----|---------|-------------------------------|
| A5.02514 | F01G10.10 | GTGAGGT | GTATGTC | 5   | -25.78% | ce10::chrIV:10247573-10248290 |
| A5.01310 | hhat-1    | GTGAGGT | GTTCAGG | 5   | -25.61% | ce10::chrII:14679188-14679589 |
| A5.00091 | ptr-12    | GTGAGGT | GTCATTT | 5   | -23.62% | ce10::chrI:2591001-2592034    |
| A5.01245 | Y48C3A.20 | GTCACTG | GTAATAG | -32 | 23.44%  | ce10::chrII:13370532-13372010 |
| A5.03051 | F52E1.5   | GTTAGTT | GTTATCA | 13  | -23.18% | ce10::chrV:8379561-8380216    |
| A5.02222 | yars-2    | GTACGTG | GTGAGTC | -14 | 23.16%  | ce10::chrIV:4712278-4712593   |
| A5.01708 | egl-5     | GTGAGTT | GTCAGTT | 12  | -22.97% | ce10::chrIII:7815119-7816078  |
| A5.03854 | sax-3     | GTGAGCT | GTATTTT | 15  | -21.70% | ce10::chrX:3452959-3453373    |
| A5.03517 | D1086.12  | GTGGGTT | GTATTTG | 9   | -20.36% | ce10::chrV:14101693-14101992  |

### A5 SZ371 snu-66(H765L) vs. N2

| event_name | Gene      | Upstream<br>5'ss | Downstream<br>5'ss | Distance<br>Between<br>5'ss | AvgΔPSI | Genome<br>Position             |
|------------|-----------|------------------|--------------------|-----------------------------|---------|--------------------------------|
| A5.02960   | gon-14    | GTCAAGT          | GTGAGCT            | -34                         | 83.05%  | ce10::chrV:6606743-6607634     |
| A5.00377   | rskn-2    | GTAATGT          | GTGAGAA            | -5                          | 76.20%  | ce10::chrI:8019510-8019846     |
| A5.03011   | ddo-2     | GTGAGGT          | GTTCTTT            | 5                           | -73.08% | ce10::chrV:7434437-7434972     |
| A5.01059   | T01B7.13  | GTGGGTA          | GTATCAT            | 4                           | -68.37% | ce10::chrII:8715381-8715705    |
| A5.00248   | gpa-14    | GTGAGTT          | GTTGTAA            | 11                          | -63.76% | ce10::chrI:5942827-5943857     |
| A5.01914   | Y41C4A.12 | GCAAGTC          | GTCGAAT            | 4                           | -62.51% | ce10::chrIII:11723948-11724259 |
| A5.02115   | Y41D4A.6  | GTGGGGG          | GTTCTTC            | 6                           | -59.04% | ce10::chrIV:1741285-1741629    |
| A5.00979   | syd-1     | GTTAGTG          | GTGAGTT            | -4                          | 48.60%  | ce10::chrII:7585968-7586802    |
| A5.01610   | mapk-15   | GTGGGTA          | GTAATTA            | 4                           | -48.09% | ce10::chrIII:6070614-6071060   |
| A5.00193   | M04F3.4   | GTCTTTT          | GTGATTT            | -17                         | 47.14%  | ce10::chrI:4771344-4771687     |
| A5.01996   | pdr-1     | GTAGGTC          | GTCAAGT            | 4                           | -45.72% | ce10::chrIII:13771543-13771926 |
| A5.01464   | Y53G8AR.8 | GTTTCAG          | GCGATTT            | -27                         | 45.50%  | ce10::chrIII:3293673-3294054   |
| A5.02366   | ntl-4     | GTCGGTG          | GTTTCGTA           | -6                          | 44.47%  | ce10::chrIV:7911487-7911824    |
| A5.01647   | C09E7.7   | GTGTTCA          | GTGAGAA            | -9                          | 43.45%  | ce10::chrIII:6550487-6550821   |
| A5.00138   | smp-2     | GTGAGCA          | GTTTTGA            | 33                          | -42.76% | ce10::chrI:3667189-3667866     |
| A5.03552   | hil-1     | GTTAGTG          | GTACTGT            | 12                          | -42.35% | ce10::chrV:14951846-14952475   |
| A5.02362   | T14A8.2   | GTGAGTT          | GTAATGT            | 15                          | -42.02% | ce10::chrIV:7822017-7822620    |
| A5.00387   | kcnl-2    | GTAGCGT          | GTTTCGTT           | -20                         | 40.80%  | ce10::chrI:8207887-8208594     |
| A5.03311   | math-33   | GTGAGTT          | GTAAGTT            | 9                           | -40.27% | ce10::chrV:11117403-11117727   |
| A5.02596   | ltah-1.1  | GTTGTGA          | GTGATTT            | -3                          | 39.29%  | ce10::chrIV:12279926-12280270  |
| A5.03883   | lst-2     | GTGGTGA          | GTGAGAA            | -3                          | 39.24%  | ce10::chrX:4379331-4379658     |
| A5.03318   | K10D6.2   | GTTGGTA          | GTAGTTT            | 4                           | -38.95% | ce10::chrV:11193895-11194330   |
| A5.01616   | C23G10.7  | GTGAGCA          | ATTAGTC            | 27                          | -38.84% | ce10::chrIII:6196154-6196545   |
| A5.02919   | ncx-2     | GTAACGG          | GTTTGTG            | -6                          | 38.81%  | ce10::chrV:5308471-5308917     |
| A5.00154   | unc-73    | GTGAGTG          | GTAGGAA            | 45                          | -38.07% | ce10::chrI:4002365-4002746     |
| A5.01378   | Y82E9BR.5 | GTAAGTG          | GTGAGTA            | -4                          | 37.90%  | ce10::chrIII:1385081-1387559   |
| A5.04294   | K04C1.2   | GTACAGG          | GTCAGTT            | -27                         | 37.49%  | ce10::chrX:14238681-14239042   |
| A5.01029   | pch-2     | GTTGTGA          | GTGAGCG            | -3                          | 37.22%  | ce10::chrII:8158285-8158545    |
| A5.03532   | F14D7.6   | GTTTCGTT         | GTAATTT            | 37                          | -36.91% | ce10::chrV:14302154-14305416   |
| A5.00652   | Y105E8B.7 | GTGAGGT          | GTTACAC            | 5                           | -36.51% | ce10::chrI:14645995-14646546   |
| A5.03475   | T10G3.1   | GTTTCGAG         | GTCCATA            | 15                          | -36.41% | ce10::chrV:13470645-13473513   |
| A5.00046   | Y34D9A.8  | GTTTGTG          | GTAGAGT            | 18                          | -36.03% | ce10::chrI:1051917-1052238     |
| A5.01456   | daf-2     | GTGGGTC          | GTCTAGT            | 4                           | -35.57% | ce10::chrIII:3010401-3012324   |
| A5.00827   | hlh-1     | GTGAGCT          | GTTAGTA            | 22                          | -35.51% | ce10::chrII:4521586-4522110    |
| A5.00118   | zip-4     | GTGAGGT          | GTGCCAG            | 5                           | -35.46% | ce10::chrI:3264333-3264677     |

|          |            |         |          |     |         |                                |
|----------|------------|---------|----------|-----|---------|--------------------------------|
| A5.03669 | nhr-65     | GTGAGTT | GTAAAAA  | 12  | -35.10% | ce10::chrV:18841168-18841720   |
| A5.04156 | pkn-1      | GTCAGTA | GTGAGTA  | -18 | 34.82%  | ce10::chrX:10400056-10400563   |
| A5.01830 | T16H12.3   | GTTAATT | GTAAACT  | 12  | -34.06% | ce10::chrIII:10081668-10082004 |
| A5.03517 | D1086.12   | GTGGGTT | GTATTTG  | 9   | -33.78% | ce10::chrV:14101693-14101992   |
| A5.00899 | C30B5.2    | GTACGGG | GTTAGTT  | -6  | 33.60%  | ce10::chrIII:6197332-6197654   |
| A5.01859 | rnf-113    | GTGAGAT | GTACTTT  | 11  | -33.49% | ce10::chrIII:10757191-10757547 |
| A5.01644 | acr-5      | GTATGGG | GTAAGCA  | -18 | 33.44%  | ce10::chrIII:6514429-6514756   |
| A5.01701 | cup-5      | GTCGGTG | GTGCGTG  | -4  | 32.95%  | ce10::chrIII:7590471-7591017   |
| A5.01451 | Y71H2AM.2  | GTAAGGA | GTTGAGT  | -7  | 31.66%  | ce10::chrIII:2824523-2825830   |
| A5.04159 | mig-15     | GTGAGTC | GTTTTGT  | 15  | -31.65% | ce10::chrX:10425190-10425705   |
| A5.01151 | mpz-1      | GTTGGTA | GTAAGCA  | 12  | -31.48% | ce10::chrIII:10740233-10741190 |
| A5.00760 | math-41    | GCAAGTA | GTACAGT  | 4   | -30.01% | ce10::chrII:1827136-1829057    |
| A5.04030 | sgca-1     | GTAGTAA | GTAAGAA  | -3  | 29.92%  | ce10::chrX:6788323-6788615     |
| A5.04365 | ZK54.3     | GTGAATC | GTAAGGC  | 12  | -28.68% | ce10::chrX:17465584-17466072   |
| A5.01653 | rbf-1      | GTGGTTA | GTTAGTG  | -3  | 28.53%  | ce10::chrIII:6697930-6698675   |
| A5.02121 | C23H5.8    | GTACTCC | GTTGGGC  | -9  | 28.14%  | ce10::chrIV:2111941-2112500    |
| A5.01447 | Y71H2AM.20 | GTTAATT | GTAAAAAT | 21  | -27.87% | ce10::chrIII:2782797-2784072   |
| A5.00469 | irx-1      | GTGAGGT | GTGAATA  | 13  | -27.79% | ce10::chrI:9537044-9538343     |
| A5.01591 | mdt-15     | GTAAGTT | GTAGAGT  | 9   | -27.06% | ce10::chrIII:5829544-5830287   |
| A5.03788 | lmp-2      | GTGGGTT | GTATTTT  | 10  | -26.36% | ce10::chrX:1125565-1125869     |
| A5.03934 | T23F2.2    | GTTTGT  | GTTCTCA  | 12  | -26.09% | ce10::chrX:5497170-5497833     |
| A5.03365 | mpst-1     | GTCATGT | GTAAAAG  | -5  | 25.83%  | ce10::chrV:11826022-11826361   |
| A5.04065 | twk-17     | GTTGGTC | GTAAAAC  | 15  | -23.81% | ce10::chrX:7600273-7601045     |
| A5.04332 | nhr-48     | GTATTCT | GTCAGTA  | -18 | 22.76%  | ce10::chrX:15711273-15711635   |
| A5.01636 | C05D11.8   | GTACTCG | GTAAGTT  | -6  | 22.75%  | ce10::chrIII:6427092-6427393   |
| A5.00462 | twk-29     | GTGGGTT | GTAAATT  | 20  | -22.68% | ce10::chrI:9468019-9468401     |
| A5.03493 | T01D3.6    | GTCAGTA | GTACCGC  | 36  | -20.53% | ce10::chrV:13718434-13718767   |

## EnsArch65 Events

pairSum=9 for  $\Delta\text{PSI} \geq 0.15$  Average  $\Delta\text{PSI} > 0.20$

### SZ211 snrp-27(M141T) vs. N2

#### AF - Alternative First Exon

| event_name | Gene   | Avg $\Delta\text{PSI}$ | Genomic Position              |
|------------|--------|------------------------|-------------------------------|
| AF.0000351 | R102.4 | -32.23%                | ce10::chrIV:10694015-10695193 |

#### RI - Retained Intron

| event_name | Gene     | Avg $\Delta\text{PSI}$ | Genomic Position             |
|------------|----------|------------------------|------------------------------|
| RI.0000291 | swp-1    | -34.34%                | ce10::chrIII:5704433-5704682 |
| RI.0000497 | cyp-34A9 | -28.73%                | ce10::chrV:3968219-3968629   |

### SZ370 snu-66(H765G) vs. N2

#### AF - Alternative First Exon

| event_name | Gene       | Avg $\Delta\text{PSI}$ | Genomic Position              |
|------------|------------|------------------------|-------------------------------|
| AF.0000375 | ent-7      | -61.48%                | ce10::chrIV:10017404-10019559 |
| AF.0000598 | Y62E10A.13 | 38.64%                 | ce10::chrIV:13392323-13398775 |
| AF.0000537 | fkf-5      | -37.58%                | ce10::chrI:3899124-3899909    |
| AF.0000351 | R102.4     | -40.60%                | ce10::chrIV:10694015-10695193 |

|            |        |        |                             |
|------------|--------|--------|-----------------------------|
| AF.0000168 | gck-1  | 30.12% | ce10::chrV:8949142-8952060  |
| AF.0000151 | bre-1  | 27.92% | ce10::chrIV:8987253-8988865 |
| AF.0000419 | yars-2 | 23.16% | ce10::chrIV:4712284-4712506 |

#### RI - Retained Intron

| event_name | Gene      | Avg $\Delta$ PSI | Genomic Position               |
|------------|-----------|------------------|--------------------------------|
| RI.0000196 | npp-8     | -68.66%          | ce10::chrIV:1595414-1595823    |
| RI.0000291 | swp-1     | -48.70%          | ce10::chrIII:5704433-5704682   |
| RI.0000766 | nmtn-1    | -55.51%          | ce10::chrI:6477212-6477528     |
| RI.0000751 | ltah1.1   | -52.25%          | ce10::chrIV:12279736-12280313  |
| RI.0000286 | T2D1.3    | -50.03%          | ce10::chrIV:6915593-6916164    |
| RI.0000834 | add-1     | -34.18%          | ce10::chrX:4854800-4855025     |
| RI.0000109 | ddo-2     | -52.75%          | ce10::chrV:7433610-7433889     |
| RI.0000691 | unc-49    | -43.78%          | ce10::chrIII:10529637-10529859 |
| RI.0000816 | C17C3.1   | -36.75%          | ce10::chrII:5570868-5571028    |
| RI.0000664 | T19D12.2  | -39.14%          | ce10::chrII:6664341-6664601    |
| RI.0000468 | rsp-5     | -40.22%          | ce10::chrII:6490769-6491030    |
| RI.0000112 | nhr-109   | -36.67%          | ce10::chrII:4433535-4434220    |
| RI.0000638 | chat-1    | -36.67%          | ce10::chrIV:4448321-4448828    |
| RI.0000563 | Y48G1C.10 | -33.68%          | ce10::chrI:84614-84959         |
| RI.0000375 | rbm-5     | -34.47%          | ce10::chrI:6215921-6216170     |
| RI.0000153 | acdh-2    | -35.40%          | ce10::chrII:5546556-5547280    |
| RI.0000652 | F46H5.2   | -32.45%          | ce10::chrX:7266688-7266996     |
| RI.0000736 | F41E6.5   | -34.15%          | ce10::chrV:8604534-8604875     |
| RI.0000485 | nhr-50    | -32.65%          | ce10::chrV:15998737-15999090   |
| RI.0000548 | F45F2.9   | -33.07%          | ce10::chrV:8512922-8513187     |
| RI.0000794 | Y47G6A.7  | -34.44%          | ce10::chrI:3502741-3503010     |
| RI.0000120 | mapk-15   | -29.78%          | ce10::chrIII:6068396-6068866   |
| RI.0000760 | cbp-3     | -30.69%          | ce10::chrIII:9915280-9915725   |
| RI.0000678 | shc-1     | -26.61%          | ce10::chrI:972651-972940       |
| RI.0000359 | Y50D7A.3  | -23.70%          | ce10::chrIII:256096-257585     |
| RI.0000322 | vps-34    | -24.19%          | ce10::chrI:6029161-6030657     |
| RI.0000263 | tos-1     | -28.50%          | ce10::chrV:9343652-9344105     |
| RI.0000095 | nac-3     | -26.00%          | ce10::chrIII:10152704-10153035 |
| RI.0000787 | ugt-50    | -21.87%          | ce10::chrX:12692594-12692824   |
| RI.0000574 | Iron-8    | -24.84%          | ce10::chrI:5772739-5773607     |
| RI.0000587 | ZK470.2   | -23.57%          | ce10::chrX:4146424-4146994     |

#### SE - Skipped Exon

| event_name | Gene    | Avg $\Delta$ PSI | Genomic Position             |
|------------|---------|------------------|------------------------------|
| SE.0000168 | ced-1   | 28.23%           | ce10::chrI:11851944-11855810 |
| SE.0000454 | F49E2.5 | 30.01%           | ce10::chrX:9553880-9556660   |

#### SZ371 snu-66(H765L) vs. N2

##### A3 - de novo alternative 3'ss discovery

| event_name | Gene  | Avg $\Delta$ PSI | Genomic Position           |
|------------|-------|------------------|----------------------------|
| A3.03927   | dop-1 | -25.19%          | ce10::chrX:4411558-4411902 |

#### AF - Alternative First Exon

| event_name | Gene       | Avg $\Delta$ PSI | Genomic Position              |
|------------|------------|------------------|-------------------------------|
| AF.0000598 | Y62E10A.13 | 48.08%           | ce10::chrIV:13392323-13398775 |
| AF.0000168 | gck-1      | 40.79%           | ce10::chrV:8949142-8952060    |
| AF.0000537 | fkf-5      | -38.48%          | ce10::chrI:3899124-3899909    |
| AF.0000351 | R102.4     | -36.00%          | ce10::chrIV:10694015-10695193 |
| AF.0000559 | lmp-2      | 26.36%           | ce10::chrX:1125167-1125858    |
| AF.0000116 | nadk-2     | -22.21%          | ce10::chrII:12049519-12054767 |

#### MX - Mutually Exclusive Exons

| event_name | Gene   | Avg $\Delta$ PSI | Genomic Position             |
|------------|--------|------------------|------------------------------|
| MX.0000009 | lev-11 | -21.92%          | ce10::chrI:14621164-14622886 |

#### RI - Retained Intron

| event_name | Gene     | Avg $\Delta$ PSI | Genomic Position               |
|------------|----------|------------------|--------------------------------|
| RI.0000497 | cyp-34A9 | -41.67%          | ce10::chrV:3968219-3968629     |
| RI.0000291 | swp-1    | -44.82%          | ce10::chrIII:5704433-5704682   |
| RI.0000766 | nmtn-1   | -47.19%          | ce10::chrI:6477212-6477528     |
| RI.0000691 | unc-49   | -34.10%          | ce10::chrIII:10529637-10529859 |
| RI.0000109 | ddo-2    | -38.61%          | ce10::chrV:7433610-7433889     |
| RI.0000003 | gar-2    | -29.95%          | ce10::chrIII:6319279-6319554   |
| RI.0000468 | rsp-5    | -34.31%          | ce10::chrII:6490769-6491030    |
| RI.0000664 | T19D12.2 | -27.83%          | ce10::chrII:6664341-6664601    |
| RI.0000112 | nhr-109  | -34.41%          | ce10::chrII:4433535-4434220    |
| RI.0000546 | aat-5    | -27.66%          | ce10::chrI:2573743-2574269     |
| RI.0000638 | chat-1   | -28.41%          | ce10::chrIV:4448321-4448828    |
| RI.0000222 | F27D4.6  | -24.05%          | ce10::chrI:7736997-7737203     |
| RI.0000787 | ugt-50   | -22.89%          | ce10::chrX:12692594-12692824   |
| RI.0000263 | tos-1    | -27.76%          | ce10::chrV:9343652-9344105     |
| RI.0000760 | cbp-3    | -25.78%          | ce10::chrIII:9915280-9915725   |
| RI.0000751 | ltah1.1  | -22.66%          | ce10::chrIV:12279736-12280313  |

#### SE - Skipped Exon

| event_name | Gene    | Avg $\Delta$ PSI | Genomic Position           |
|------------|---------|------------------|----------------------------|
| SE.0000597 | C53B7.3 | 35.69%           | ce10::chrX:6845296-6845860 |
